# Supplementary material for: MYC Targeted Rad50 Drives Progression of High-Grade Serous Ovarian Cancer via NF-κB Activation
Source: Research Square preprint supplement (doi:10.21203/rs.3.rs-111959/v1), 2020-11-24
Supplement: Supplementary file 2 [file 474549ed78bb63ad712611ae.docx]

**Supplementary Fig. S1**

**

**

**Supplementary Fig. S2**

**
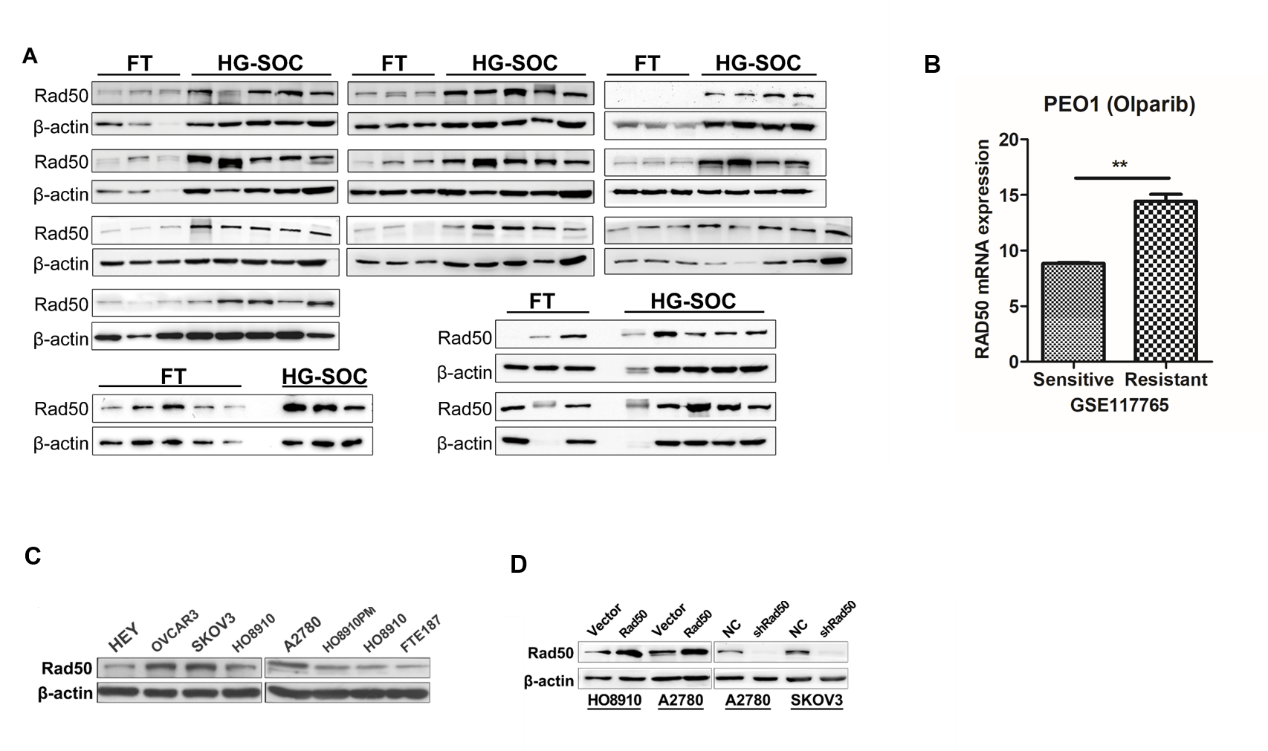
**

**C**

**
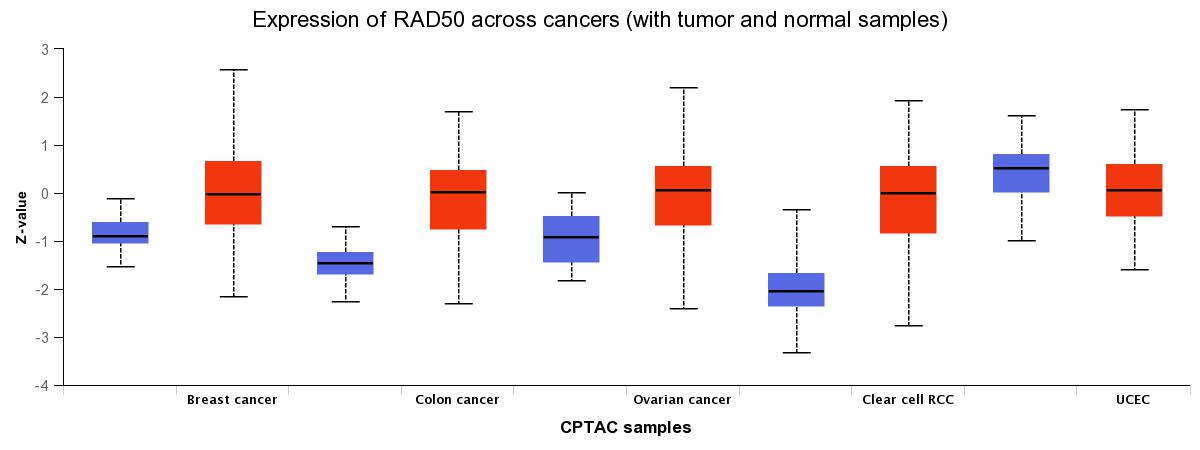
**

**D**

**
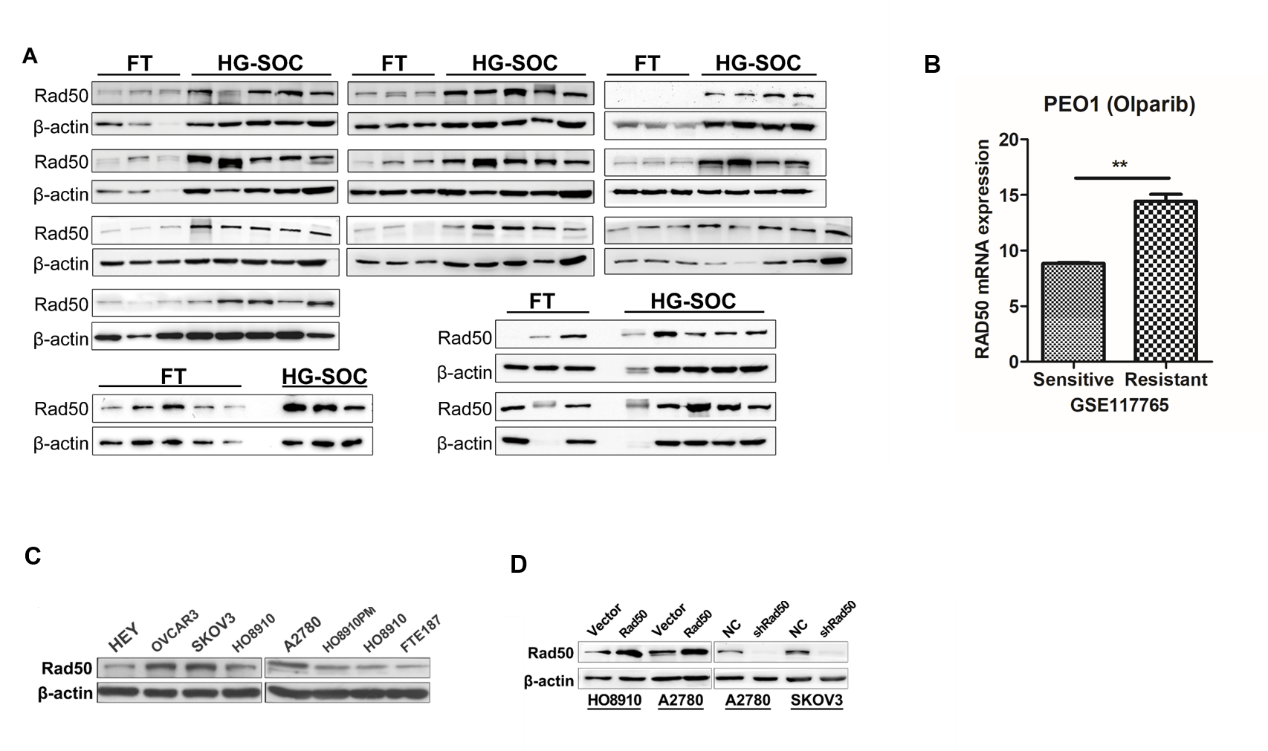
**

**Supplementary Fig. S3**

**
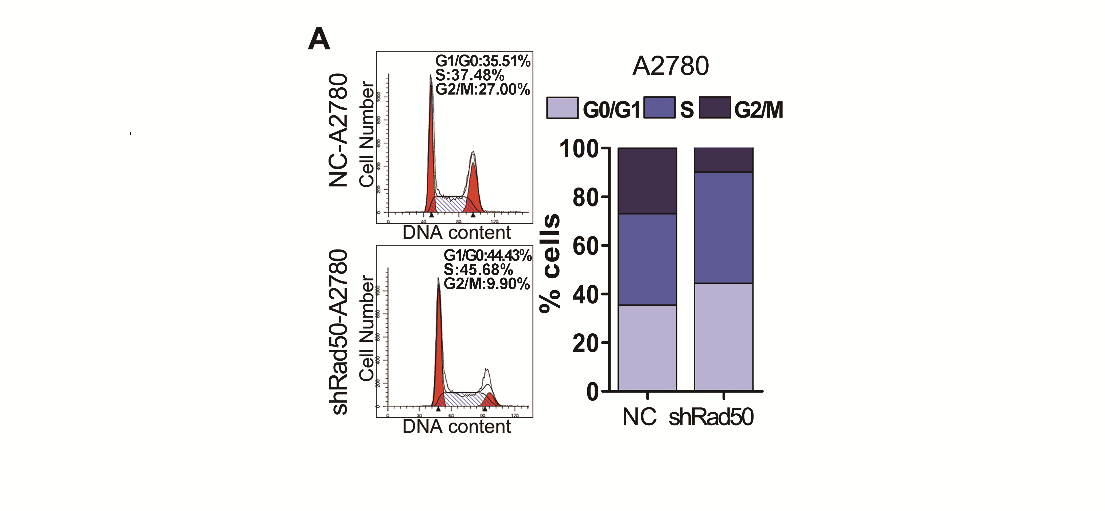
**

**Supplementary Fig. S4**

**
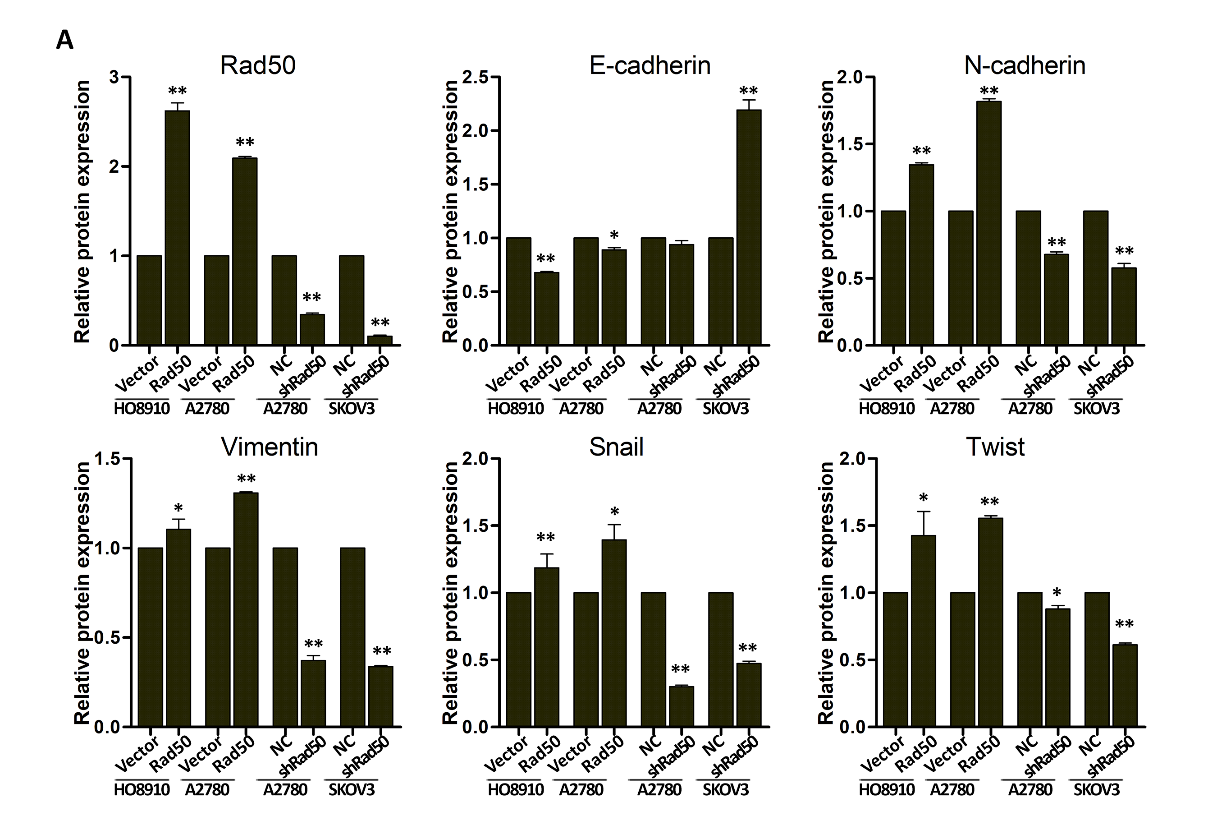
**

**Supplementary Fig. S5**

**
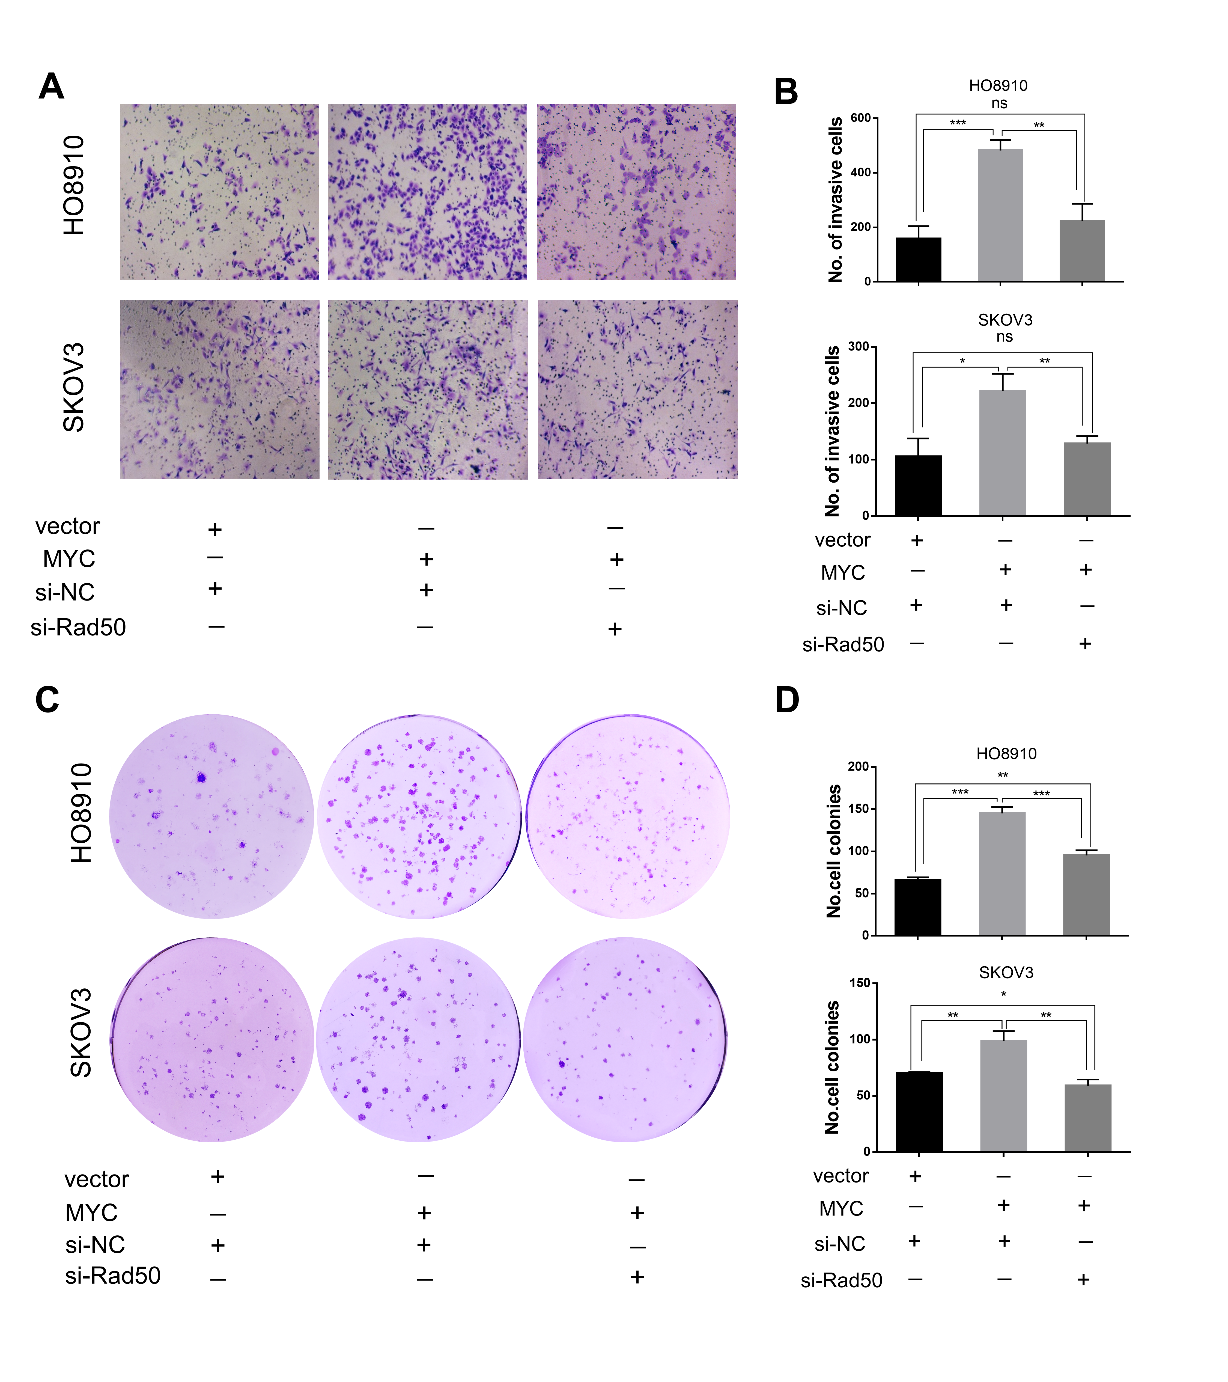
**

**Supplementary Fig. S6**

**
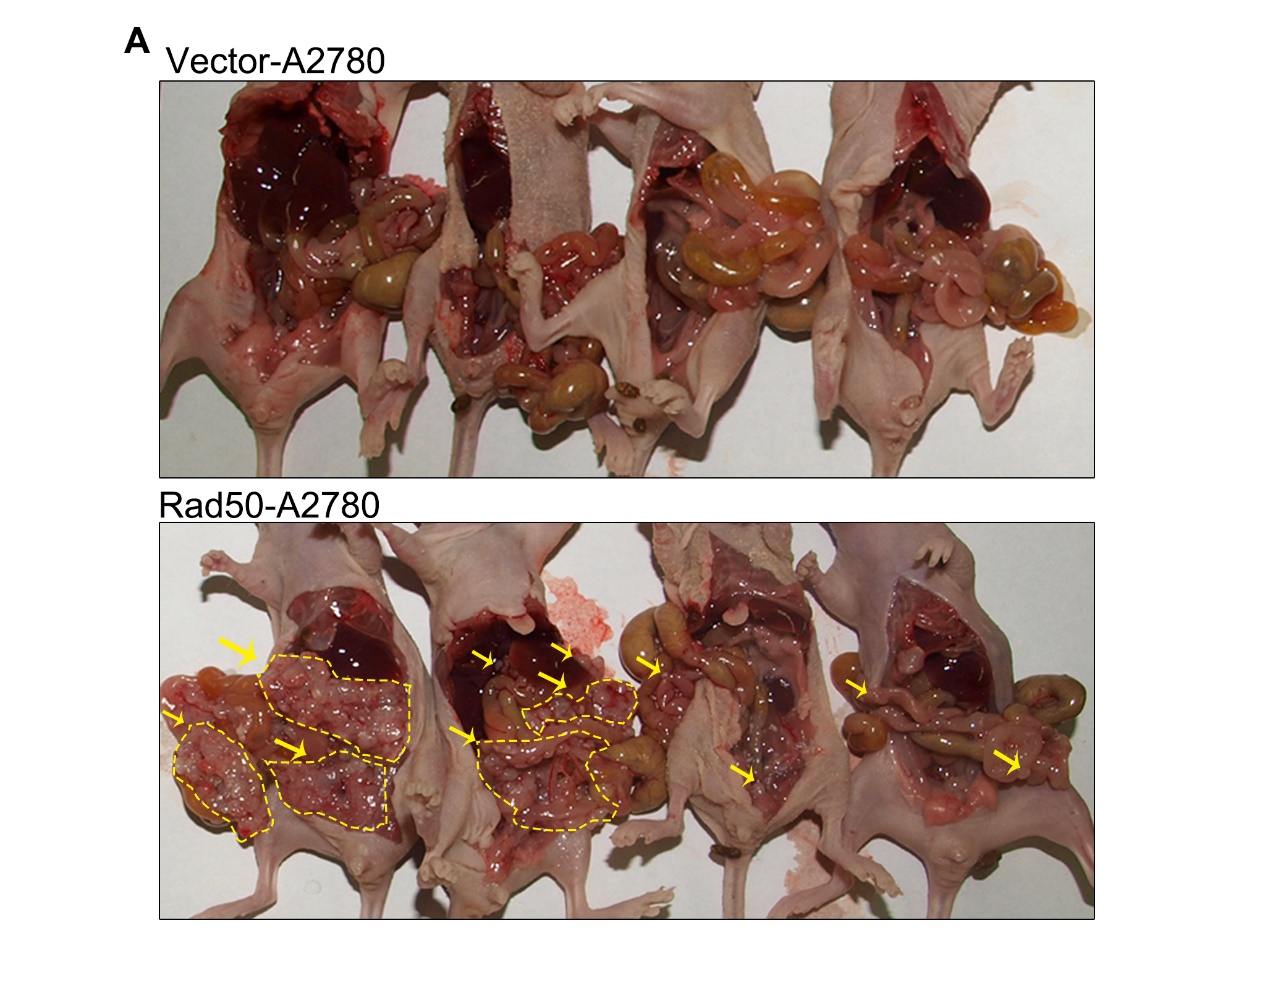
**

**Supplementary Fig. S7**

**
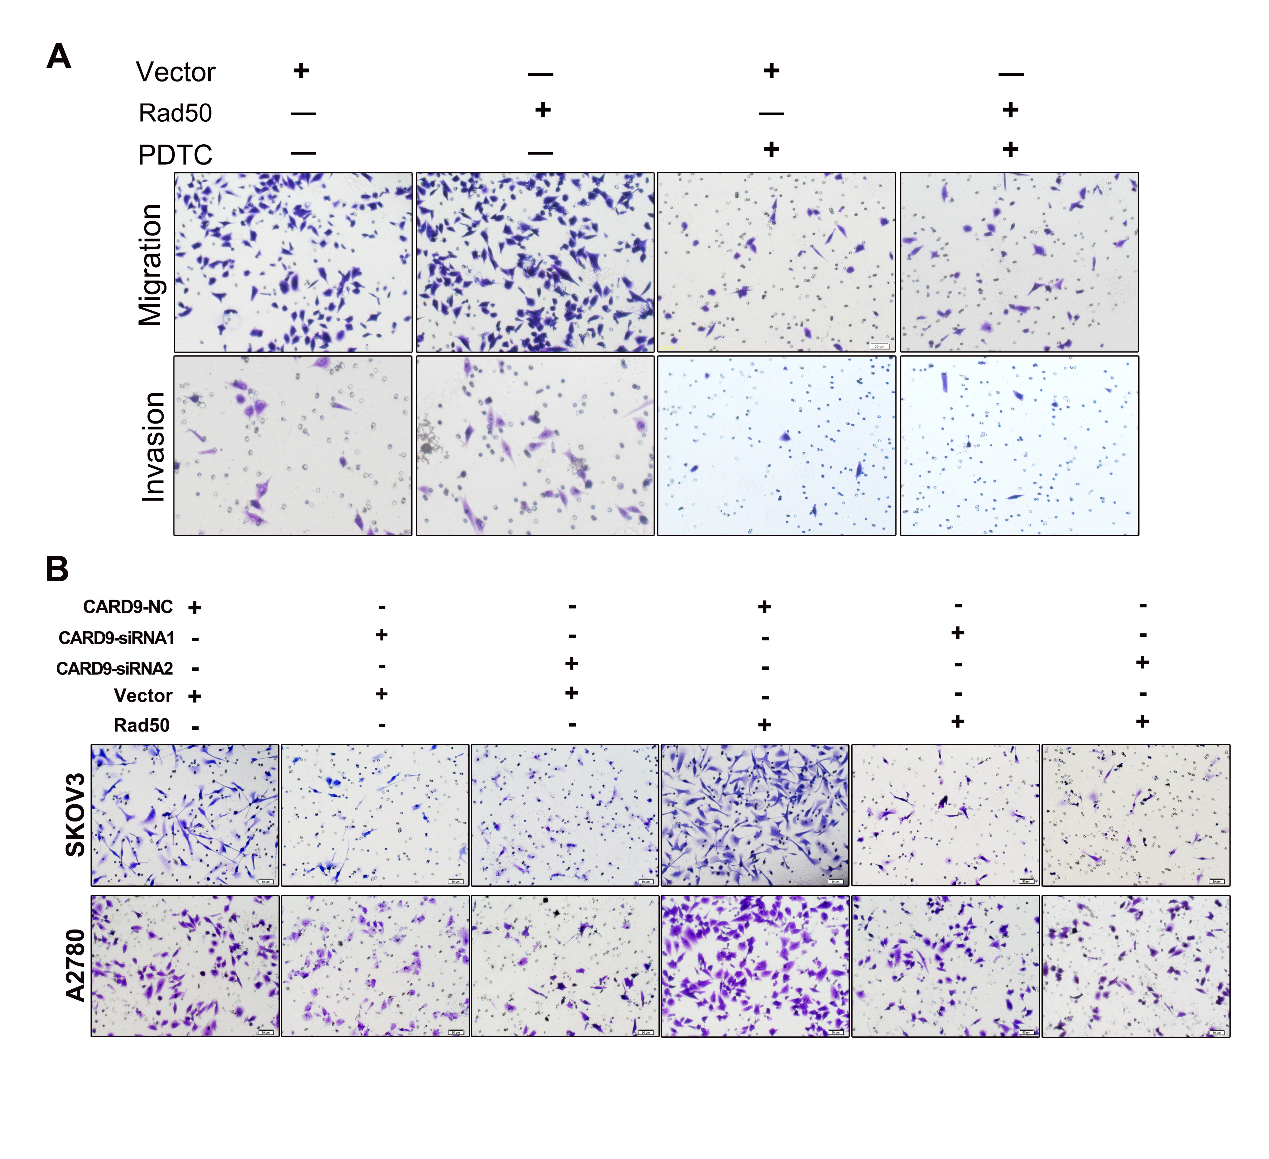
**
